# Supplementary material for: High Expression of SOX2 Is Associated with Poor Prognosis in Patients with Salivary Gland Adenoid Cystic Carcinoma
Source: PubMed Central journal article supplement (PMC4057738; doi:10.3390/ijms15058393), 2014-05-13
Supplement: ijms-15-08393-s001.pdf [file ijms-15-08393-s001.pdf]

## Supplementary Information

**Figure S1.** The standard curves and amplification plots of *SOX2* and  $\beta$ -actin. **(a)** Standard curve of *SOX2*; **(b)** Amplification plots of *SOX2*; **(c)** Standard Curve of  $\beta$ -actin; **(d)** Amplification plots of  $\beta$ -actin; **(e,f)** Standard curves of  $\beta$ -actin in ACC tissue and non-cancerous tissue.

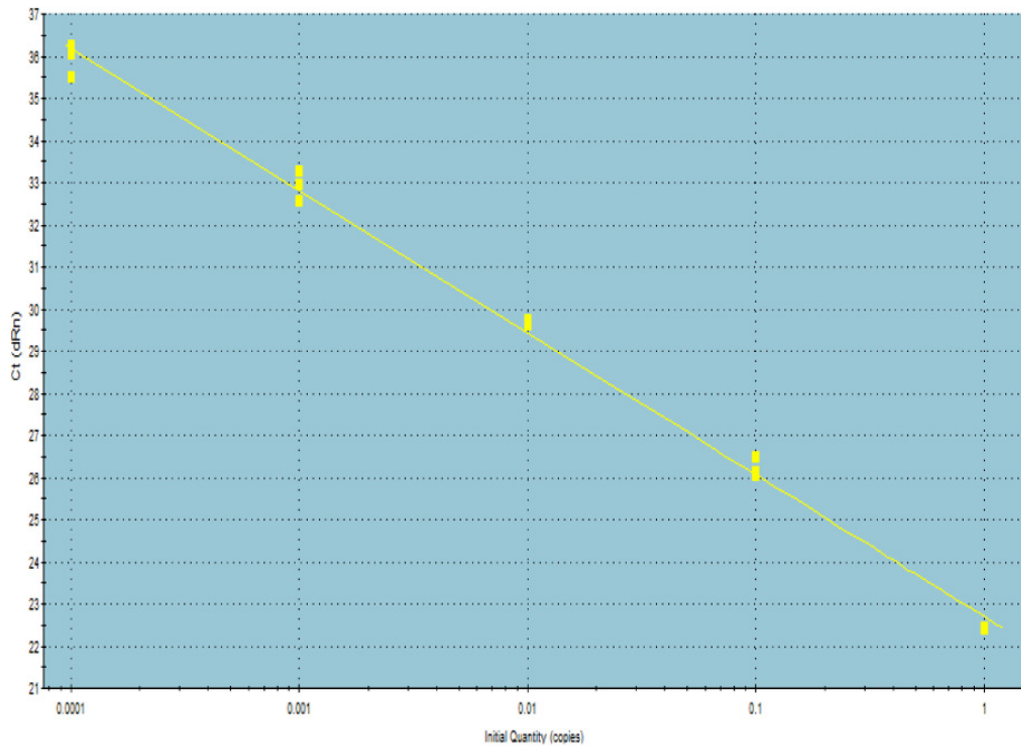

**(a)**

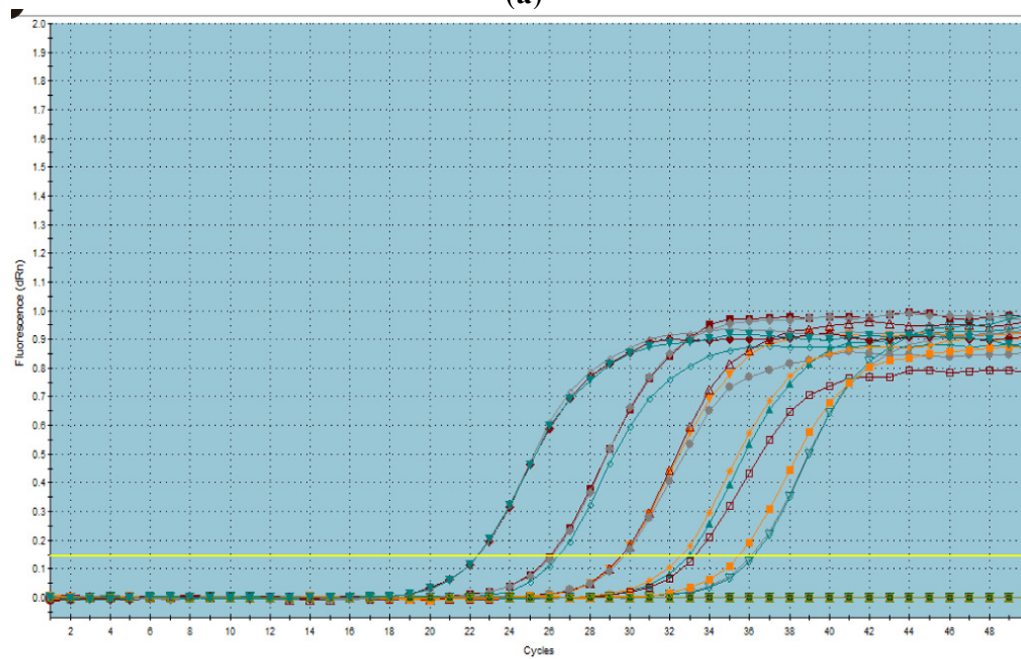

**(b)**

Figure S1. Cont.

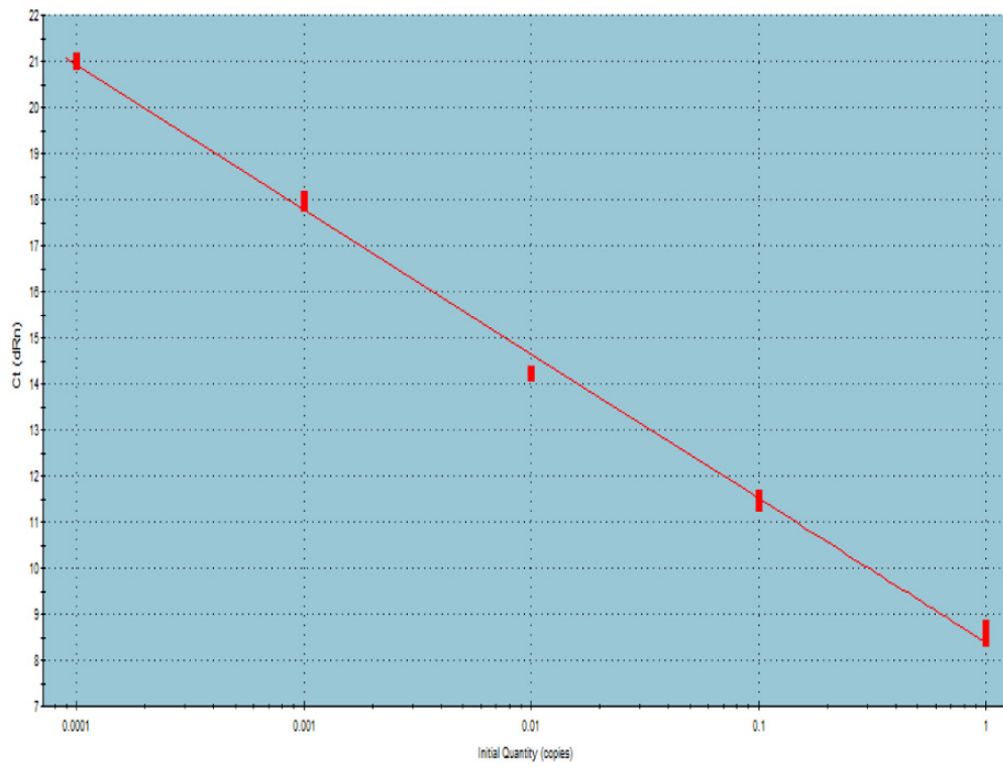

(c)

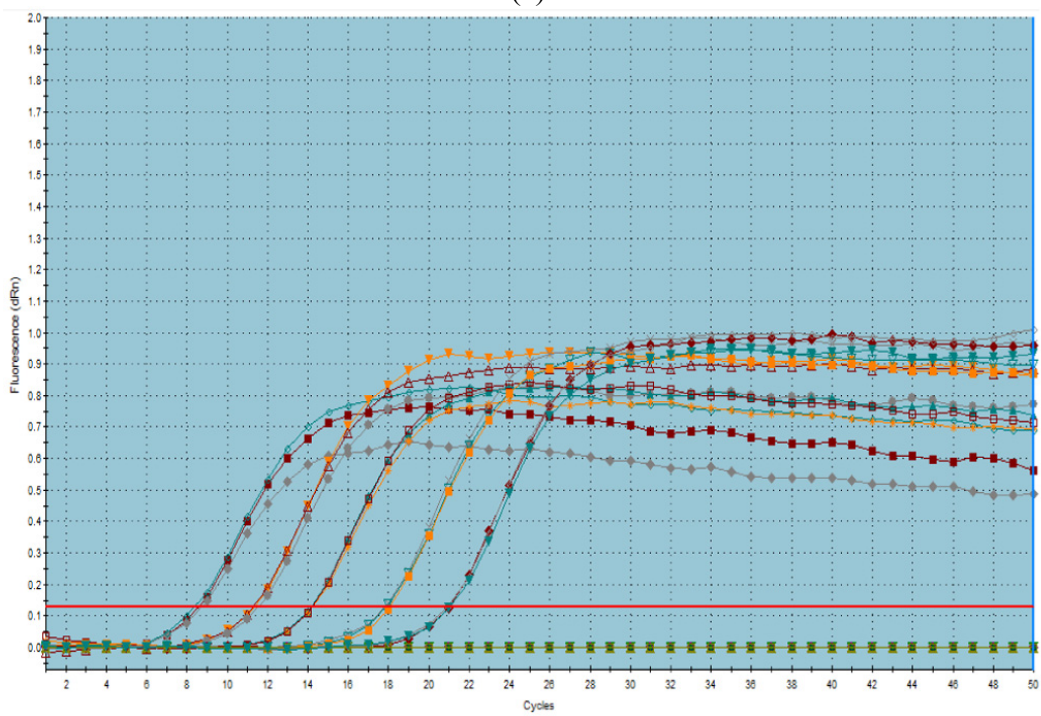

(d)

Figure S1. Cont.

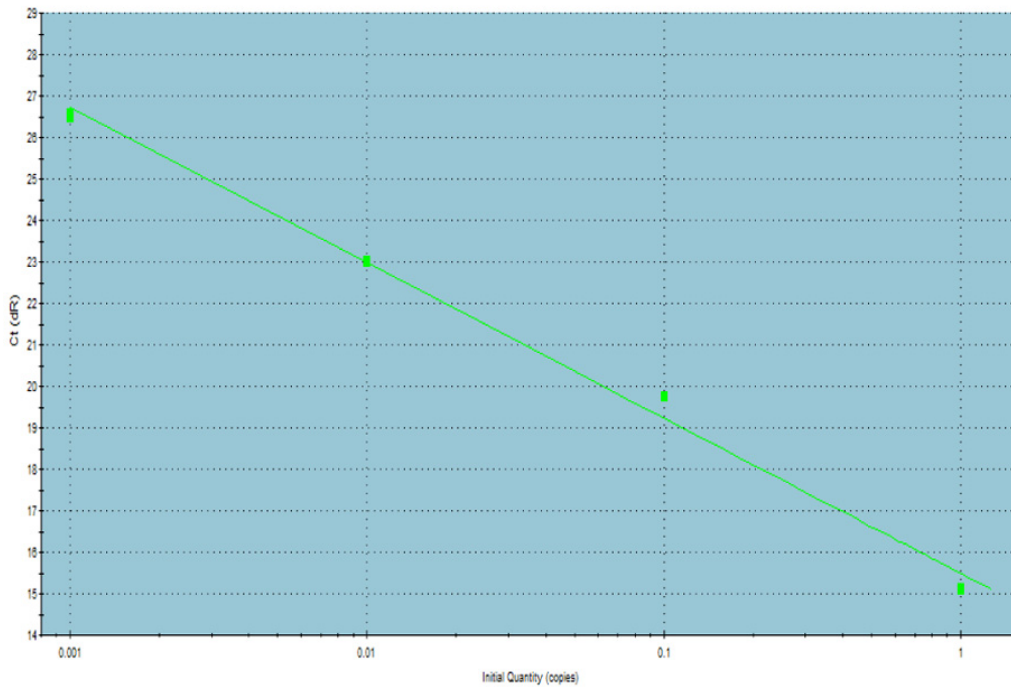

(e)

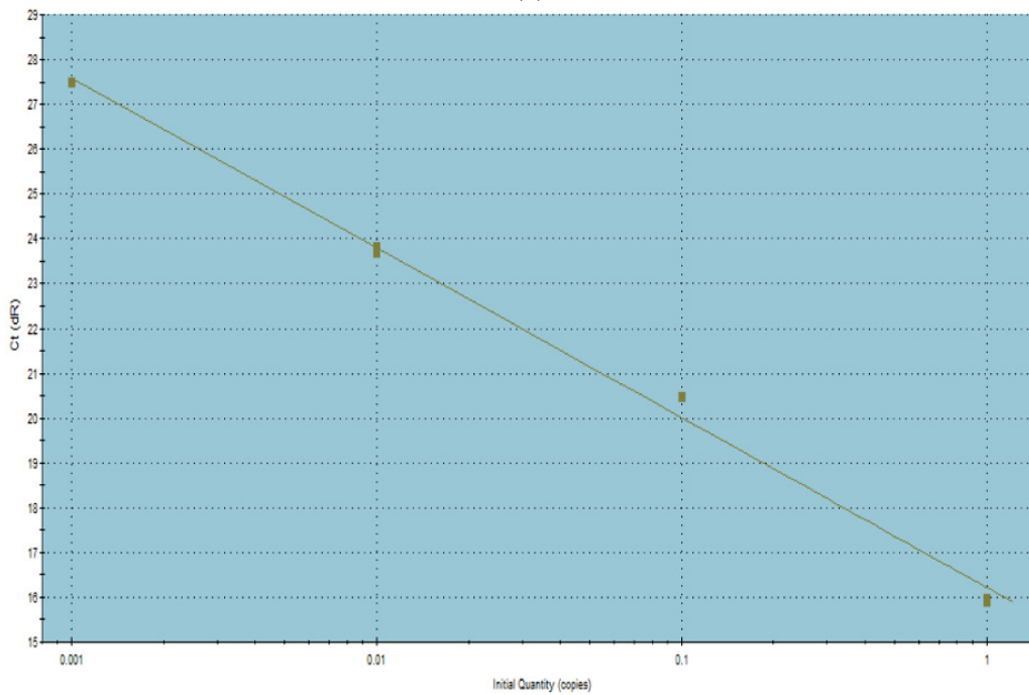

(f)

© 2014 by the authors; licensee MDPI, Basel, Switzerland. This article is an open access article distributed under the terms and conditions of the Creative Commons Attribution license (<http://creativecommons.org/licenses/by/3.0/>).
